# Supplementary material
Source: publisher figshare collection journal article supplement (https://acs.figshare.com/ndownloader/files/13292894)
Supplement: Supplementary file 1 [file 13292894]

## Supporting Information

# High Responsivity, Low Dark Current Ultraviolet Photodetectors based on Two-dimensional Electron Gas Interdigitated Transducers

Peter F. Satterthwaite,<sup>1,a)</sup> Ananth Saran Yalamarthy,<sup>2,a)</sup> Noah A. Scandrette,<sup>3</sup> A. K. M. Newaz,<sup>3</sup> and Debbie G. Senesky<sup>1,4,b)</sup>

<sup>1</sup>*Department of Electrical Engineering, Stanford University, Stanford, California, 94305, USA*

<sup>2</sup>*Department of Mechanical Engineering, Stanford University, Stanford, California, 94305, USA*

<sup>3</sup>*Department of Physics and Astronomy, San Francisco State University, San Francisco, California, 94132, USA*

<sup>4</sup>*Department of Aeronautics and Astronautics, Stanford University, Stanford, California, 94305, USA*

<sup>a)</sup> P. F. Satterthwaite and A. S. Yalamarthy contributed equally to this work

<sup>b)</sup> Author to whom correspondence should be addressed: [dsenesky@stanford.edu](mailto:dsenesky@stanford.edu)

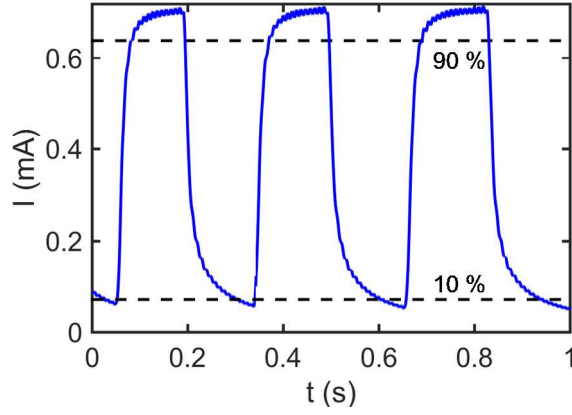

**Figure S1.** Response time of a 2DEG-IDT photodetector passivated with  $\sim 20$  nm of ALD- $\text{Al}_2\text{O}_3$  dielectric to  $\sim 0.2 \text{ mW/cm}^2$  365 nm illumination chopped at  $\sim 5$  Hz. The rise and fall times are  $\sim 30$  ms and  $\sim 100$  ms, respectively, comparable to measurements of devices without alumina.

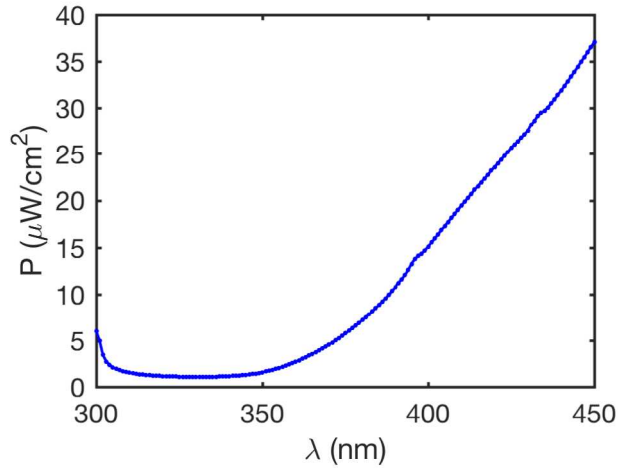

**Figure S2.** Incident power vs. wavelength calibration curve for Setup II. Incident power was measured using a Hamamatsu S1223 photodetector.
